# Supplementary material for: Toward high-performance rechargeable magnesium batteries with a Cu2Se-CTAB nanoparticle cathode and Mg[B(HFIP)4]2/DME electrolyte
Source: Royal Society of Chemistry journal article supplement (doi:10.1039/d4cc06041e), 2025-01-01
Supplement: d4cc06041e1.pdf [file d4cc06041e1.pdf]

## Electronic Supplementary Information

### **Toward high-performance rechargeable magnesium batteries with Cu<sub>2</sub>Se-CTAB nanoparticles cathode and Mg[B(HFIP)<sub>4</sub>]<sub>2</sub>/DME electrolyte**

*Tengteng Zhang, Zihang Gao, Jiguang Zhang,\* Rui Shi , Yana Liu, Jun Wang  
and Yunfeng Zhu*

*College of Materials Science and Engineering, Nanjing Tech University, 30 South Puzhu Road, Nanjing  
211816, P. R. China. E-mail: [zhangjiguang@njtech.edu.cn](mailto:zhangjiguang@njtech.edu.cn);*

#### **Experimental Section**

##### *Synthesis of Cu<sub>2</sub>Se-CTAB Nanoparticles*

0.145 g of Cu(NO<sub>3</sub>)<sub>2</sub>·3H<sub>2</sub>O and an appropriate amount (0.05 g, 0.1 g, 0.15 g, 0.2 g) of CTAB in 55 mL of deionized water, followed by ultrasonic stirring for 20 minutes. After complete dissolution, add 0.0519 g of Na<sub>2</sub>SeO<sub>3</sub>, stir for 20 minutes to form a blue-green suspension. Then, add 5 mL of N<sub>2</sub>H<sub>4</sub>·H<sub>2</sub>O dropwise and stir for 20 minutes. The resulting brown solution is transferred to a 100 mL polytetrafluoroethylene reaction autoclave liner and reacted at 180°C for 24 hours. After the reaction is complete, centrifuge to collect the product and wash alternately with alcohol and deionized water six times. Then, vacuum dry at 60°C for 12 hours to obtain the solid product, Cu<sub>2</sub>Se-CTAB nanoparticles, which are black powder. For comparison, Cu<sub>2</sub>Se nanoparticles were also prepared using the same process without adding CTAB.

### *Preparation of Electrolyte*

The entire preparation process of the APC electrolyte is completed within an argon glove box. First, take 0.6667 g of anhydrous  $\text{AlCl}_3$  powder and place it in a brown screw-cap vial. Then, add 7.5 mL of anhydrous THF to the powder slowly, and stir for 12 hours. After that, add 5 mL of phenylmagnesium chloride solution (2 M in THF) to the above solution, and stir for another 12 hours. This will yield the required 0.4 M  $\text{AlCl}_3$ -PhMgCl/THF electrolyte, which is the APC electrolyte.

The preparation of the electrolyte  $\text{Mg}[\text{B}(\text{HFIP})_4]_2/\text{DME}$  involves the following steps: First, under an argon atmosphere at 0 °C, 2.13 mL of hexafluoroisopropanol is added to 10 mL of dibutylmagnesium heptane solution within 10 minutes to obtain the solid product  $\text{Mg}(\text{HFIP})_2$ . Then, 20 mL of ethylene glycol dimethyl ether (DME) is slowly added to the mixture, and it is stirred for 30 minutes at 25°C. Subsequently, 24.4 mL of borane tetrahydrofuran complex is added dropwise over 30 minutes, followed by the slow addition of 7.07 mL of hexafluoroisopropanol over 1 hour, and the mixture is stirred for 24 hours at 25°C. After that, the mixture is vacuum dried at 60°C to obtain approximately 14.9~15.6 g of white microcrystalline powder, which is the solid product  $\text{Mg}[\text{B}(\text{HFIP})_4]_2 \cdot \text{DME}$ . Next, 4.956 g of  $\text{Mg}[\text{B}(\text{HFIP})_4]_2 \cdot \text{DME}$  is placed in a brown vial, and 10 mL of DME is added dropwise and stirred for 24 hours to obtain the 0.3 M  $\text{Mg}[\text{B}(\text{HFIP})_4]_2/\text{DME}$  electrolyte.

### *Electrochemical and Material Characterizations*

The cathode is prepared by grinding 0.07 g of active material ( $\text{Cu}_2\text{Se}$ -CTAB), 0.02 g of carbon black (Super P), and 0.01 g of polyvinylidene fluoride (PVDF) uniformly

and transferring the mixture to a 5 mL small beaker. Then, 0.5 mL of NMP is added dropwise and stirred for 4 hours to form a uniform black slurry. The slurry is coated onto the current collector carbon foil using a 200  $\mu\text{m}$  doctor blade and dried in a vacuum oven at 60°C for 12 hours. The dried material is cut into circular electrodes with a diameter of 12 mm. The loading amount of the active material is calculated by weighing and is found to be 1.5~2.0 mg  $\text{cm}^{-2}$ . The test cell is a CR2032 coin cell, assembled within an argon glove box. The separator used is a Whatman GF/D glass fiber membrane with a diameter of 18 mm. The anode is a piece of metal magnesium foil cut to 11  $\times$  11 mm in size with a thickness of 0.3 mm, which is polished and chamfered with sandpaper to remove the surface oxide layer. Galvanostatic charge-discharge (GCD) tests and rate performance tests are conducted using a Neware battery testing system, with the test environment temperature controlled at 25°C and the test range set at 0.1~2.0 V vs. Mg/Mg<sup>2+</sup>. Cyclic voltammetry (CV) and electrochemical impedance spectroscopy (EIS) tests are performed using a Shanghai Chenhua CHI760E electrochemical workstation, with the test ranges set at 0.1~2.0 V vs. Mg/Mg<sup>2+</sup> and 0.01~105 Hz, respectively.

#### *Material Characterizations*

The phases of the samples were investigated by X-ray diffraction (XRD) with Cu K $\alpha$  (40 kV and 35 mA) using an ARL X'TRA diffractometer. The micromorphology was revealed by field emission scanning electron microscopy (SEM, Hitachi, S4800) and X-ray photoelectron spectroscopy (XPS, Thermo, ESCALAB 250 XI) measurement was carried out to analyze the valence state of selected elements and

surface composition of the samples.

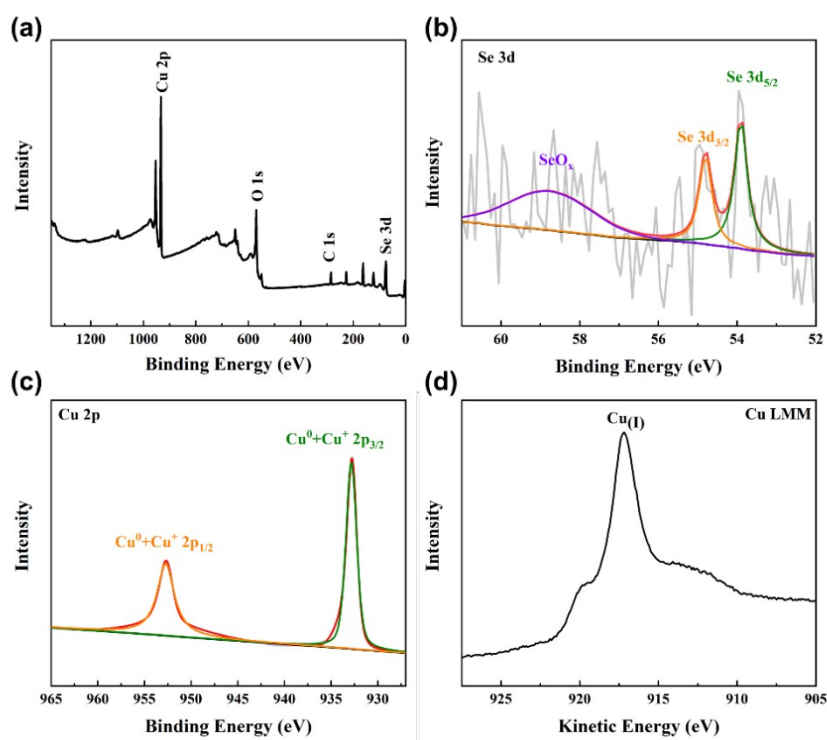

**Fig. S1.** XPS spectra of (a) full survey, (b) Cu 2p, (c) Se 3d and (d) Cu LMM for Cu<sub>2</sub>Se-100CTAB.

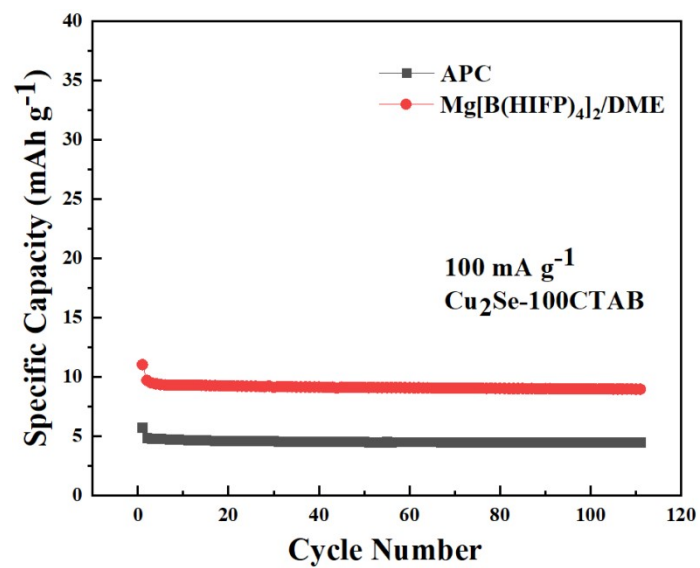

**Fig. S2.** Short cycling performance of CTAB at 100 mA g<sup>-1</sup> in APC electrolyte and 0.3 M Mg[B(HFIP)<sub>4</sub>]<sub>2</sub>/DME electrolyte.

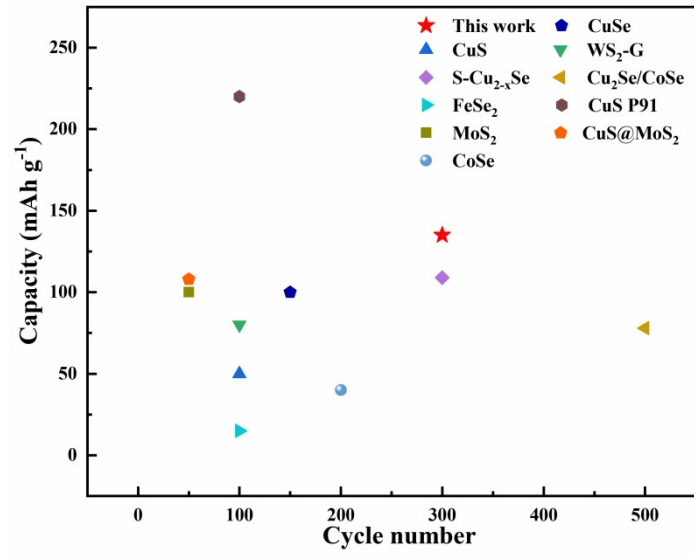

**Fig. S3.** cycling performance of Cu<sub>2</sub>Se-CTAB and other cathode materials at 100 mA g<sup>-1</sup> for magnesium-based batteries in the literature<sup>[1-8]</sup>.

**Table S1.** cycling performance of Cu<sub>2</sub>Se-CTAB and other cathode materials at different current density for magnesium-based batteries in the literature.

| Materials                         | electrolytes                                   | Rate<br>(mA g <sup>-1</sup> ) | Cycle<br>number | Capacity<br>(mAh g <sup>-1</sup> ) | Ref              |
|-----------------------------------|------------------------------------------------|-------------------------------|-----------------|------------------------------------|------------------|
| CuSe                              | APC                                            | 100                           | 150             | 100                                | [1]              |
| CuS                               | APC                                            | 100                           | 100             | 50                                 | [2]              |
| WS <sub>2</sub> -G                | APC                                            | 100                           | 100             | 75                                 | [3]              |
| S-Cu <sub>2-x</sub> Se            | (HMDS) <sub>2</sub> Mg-AlCl <sub>3</sub>       | 100                           | 300             | 109                                | [4]              |
| MoS <sub>2</sub>                  | APC-LiCl                                       | 100                           | 50              | 100                                | [5]              |
| CuS@MoS <sub>2</sub>              | APC-LiCl                                       | 100                           | 50              | 107                                | [5]              |
| CoSe                              | APC-LiCl                                       | 50                            | 50              | 114                                | [6]              |
| Cu <sub>2</sub> Se/CoSe           | APC-LiCl                                       | 100                           | 500             | 78                                 | [6]              |
| FeSe <sub>2</sub>                 | APC-LiCl                                       | 100                           | 100             | 20                                 | [7]              |
| CuS P91                           | Mg[B(HFIP) <sub>4</sub> ] <sub>2</sub> /DME    | 100                           | 100             | 220                                | [8]              |
| MgV <sub>2</sub> O <sub>4</sub>   | APC                                            | 200                           | 300             | 111.7                              | [9]              |
| VSe <sub>2</sub>                  | (HMDS) <sub>2</sub> Mg-AlCl <sub>3</sub>       | 50                            | 30              | 100                                | [10]             |
| <b>Cu<sub>2</sub>Se-<br/>CTAB</b> | <b>Mg[B(HFIP)<sub>4</sub>]<sub>2</sub>/DME</b> | <b>100</b>                    | <b>300</b>      | <b>134</b>                         | <b>This work</b> |

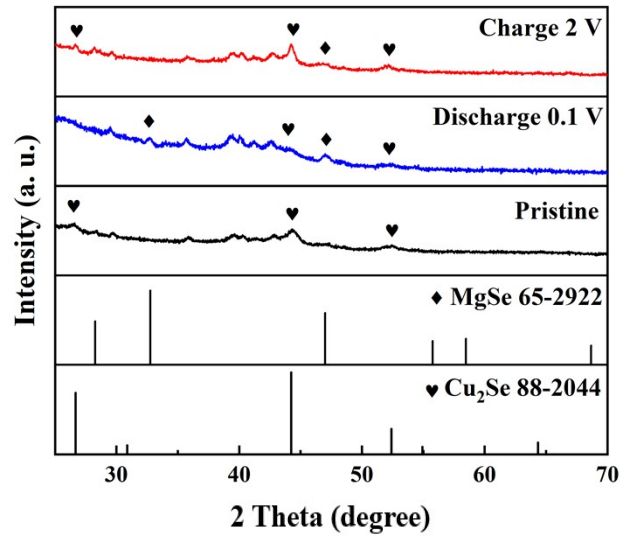

**Fig. S4** Ex-situ XRD patterns of the Cu<sub>2</sub>Se-100CTAB at various charge/discharge states.



## References

1. S. Yang, F. Q. Ji, Z. T. Wang, Y. Q. Zhu, K. K. Hu, Y. P. Ouyang, R. J. Wang, X. L. Ma and C. B. Cao, *Electrochim. Acta*, 2019, **324**.134864.
2. Q. Zhang, Y. B. Hu, J. Wang and F. S. Pan, *J. Magnes. Alloy*, 2023, **11**, 192-200.
3. M. Latha, S. Biswas and J. V. Rani, *Ionics*, 2020, **26**, 3395-3404.
4. D. Chen, Y. J. Zhang, X. Li, J. W. Shen, Z. X. Chen, S. A. Cao, T. Li and F. Xu, *Chem. Eng. J.*, 2020, **384**.123235.
5. J. X. Wang, X. Wang, J. D. Yang, X. Y. Dong, X. Chen, Y. Zhang, W. Zeng, J. Y. Xu, J. F. Wang, G. S. Huang and F. S. Pan, *J. Electrochem. Soc.*, 2022, **169**.073502.
6. Z. H. Gao, R. Shi, Y. P. Zhao, J. G. Zhang, J. C. Liu, Y. F. Zhu, Y. N. Liu, J. Wang and L. Q. Li, *Electrochim. Acta*, 2023, **469**.143298.
7. C. H. Zhang, L. R. Zhang, N. W. Li and X. Q. Zhang, *Energies*, 2020, **13**.4375.
8. X. Q. He, R. Q. Cheng, X. Y. Sun, F. Z. Sun, Y. Fu, Y. T. Li, P. Li, Z. Li, H. Xu, R. M. Laine and J. X. Zou, *Adv. Funct. Mater.*, 2024,2413893.
9. Q. Ding, T. L. Han, T. Zhou, X. R. Lin and J. Y. Liu, *Chem. Eur. J.*, 2024, **30**.e202302978.
10. D. G. Tao and F. Xu, *Mater. Lett.*, 2021, **300**.130221.
